# Supplementary material
Source: PubMed Central journal article supplement (PMC3138700)
Supplement: supp_124.15.2561_JCS085001TableS1.pdf [file supp_124.15.2561_JCS085001TableS1.pdf]

**Supplement Table 1. List of antibodies used in this study**

| <b>Primary antibody</b>   | <b>Host</b> | <b>Source</b>                         | <b>Application</b> |
|---------------------------|-------------|---------------------------------------|--------------------|
| Anti-RBP-Jκ               | Rabbit      | Sc-28713, Santa Cruz, Inc.            | ChIP (1:200)       |
| Anti-myc-tag              | Rabbit      | RDI-c-myc2, Research Diagnostic, Inc. | ChIP (1:200)       |
| Anti-Notch1               | Rabbit      | Ab8925, Abcam, Inc.                   | WB (1:500)         |
| Anti-Hes-1                | Rabbit      | (Lee et al., 2005)                    | WB (1:1000)        |
| Anti-Hey-1                | Rabbit      | Ab-22614, Abcam, Inc                  | WB (1:1000)        |
| Anti-Hes-5                | Rabbit      | H9288, Sigma, Inc.                    | WB (1:500)         |
| Anti-β-actin              | Goat        | Sc-1616, Santa Cruz, Inc.             | WB (1:200)         |
| Anti-BrdU                 | Mouse       | MS-1058-P, Fisher Scientific, Inc.    | IHC (1:100)        |
| Anti-FoxL2                | Rabbit      | PA1-802, Thermal Scientific, Inc.     | IHC (1:200)        |
| Anti-sk. myosin           | Mouse       | MS-1236, Thermal Scientific, Inc.     | IHC (1:200)        |
| Anti-α-SMA                | Rabbit      | Ab5694, Abcam, Inc                    | IHC (1:200)        |
| Anti-Hes-1                | Rabbit      | IMG-6305A, Imgenex, Inc.              | IHC (1:100)        |
| Anti-Notch1               | Mouse       | mN1A, 609102, Biologend, Inc          | IHC(1:100)         |
| <b>Secondary antibody</b> |             |                                       |                    |
| Anti-mouse IgG Texas Red  | Horse       | Vector, Inc.                          | IHC (1:250)        |
| Anti-rabbit IgG Alexa 488 | Goat        | Invitrogen, Inc.                      | IHC (1:250)        |
| Anti-rabbit IgG Alexa 555 | Goat        | Invitrogen, Inc.                      | IHC (1:250)        |
| Anti-mouse IgG Alexa 555  | Rabbit      | Invitrogen, Inc.                      | IHC (1:250)        |
| Anti-goat IgG Alexa 555   | Donkey      | Invitrogen, Inc.                      | IHC (1:250)        |

**IHC: immunohistochemistry; WB: western blotting; ChIP: chromosome immunoprecipitation**
